# Supplementary material for: Wnt6 activates endoderm in the sea urchin gene regulatory network
Source: Oxford University Press journal article supplement (doi:10.1242/dev.058792), 2011-07-12
Supplement: dev058792tables1.pdf [file dev058792tables1.pdf]

**Table S1. Primer sets for survey of all Wnts in *S. purpuratus***

|       | Forward               | Reverse              |
|-------|-----------------------|----------------------|
| Wnt1  | GTGCGATCTTATGTGCTGCT  | CGACGTGCACTCTTCACATT |
| Wnt2  | TCACATCCAGGCTTACCACA  | TGTTGGGCTCGCAGTAGTC  |
| Wnt3  | GAACAGCACAGGAACCGGTCG | TAGCAAACCCTGCGTTCC   |
| Wnt4  | CGACGGTGCTACTGAAGTCC  | GGATGGCACGAGATAGACCA |
| Wnt5a | TGCTGTGGAAGAGGCTACAA  | TTCTGCACTCCGACACTTG  |
| Wnt6  | ACTCTCAAGACCTGCTGGAA  | GGGCTGTTTGACAGTTTCGT |
| Wnt7  | CAAGGCCAAACGAACTAGGA  | ACAGTCCCCATCGAACCAT  |
| Wnt9  | GGGACGAACTGCGATAAGA   | CCAATGGAATCTGCACTGAC |
| Wnt10 | CACTTCAGGGAGGTTGGAAA  | TTACGAGGGGTGGAGAACTG |
| Wnt16 | CATGGTGTTCAGCTTCGTG   | ACGACAACCTCCACTCCTC  |

Primer sets for *Strongylocentrotus purpuratus wnt* RT-PCR (Croce et al., 2006).  
 Additional primer sets used can be found in the Materials and methods.
